# Supplementary material for: Critical research gaps and recommendations to inform research prioritisation for more effective prevention and improved outcomes in colorectal cancer
Source: PubMed Central journal article supplement — Gut. 2017 Dec 12;67(1):179–93. doi: 10.1136/gutjnl-2017-315333 (PMC5754857; doi:10.1136/gutjnl-2017-315333), 2017-12-12
Supplement: gutjnl-2017-315333supp002.pdf [file gutjnl-2017-315333supp002.pdf]

**Supplemental Table 1**

| <b>Research Gaps(RGs)</b>                                                                                                                                                                                                                                                                                                             | <b>Research Recommendations(RRs)</b>                                                                                                                                                                                                                                                      |
|---------------------------------------------------------------------------------------------------------------------------------------------------------------------------------------------------------------------------------------------------------------------------------------------------------------------------------------|-------------------------------------------------------------------------------------------------------------------------------------------------------------------------------------------------------------------------------------------------------------------------------------------|
| RG 1: A need for realistic <i>in silico</i> , <i>in vitro</i> , and <i>in vivo</i> models that more precisely recapitulate the tumour and its micro/macro-environment, to enable comprehensive dissection of the relevant mechanisms governing the transition from normal colorectum to the different malignant stages of the disease | RR1.1: Develop and share appropriate model systems that mimic different pre-malignant/malignant stages of colorectal cancer(CRC), to ensure discovery research questions are addressed in the relevant genetic/clinical context                                                           |
|                                                                                                                                                                                                                                                                                                                                       | RR1.2: Comprehensively interrogate the normal and APC-mutant colorectal crypt to reveal differences that may be exploitable for CRC prevention/control                                                                                                                                    |
|                                                                                                                                                                                                                                                                                                                                       | RR1.3: Better understand the molecular/cellular interplay between the CRC tumour and its microenvironment                                                                                                                                                                                 |
|                                                                                                                                                                                                                                                                                                                                       | RR1.4: Determine the role of the gut microbiome and how it can be exploited to improve CRC disease outcomes                                                                                                                                                                               |
| RG2: Insufficient evidence on the precise contributions of genetic, environmental and lifestyle factors, and in particular how they interact together to influence the risk of developing CRC.                                                                                                                                        | RR2.1: Conduct comprehensive genetic susceptibility studies, supported by enabling data-sharing platforms, in appropriately diverse human populations to maximise identification of genetic risks factors that have general applicability, or are relevant to specific ethnic populations |
|                                                                                                                                                                                                                                                                                                                                       | RR2.2: Develop robust data analytical tools that define and quantify the precise interplay between genetic and environmental/lifestyle factors to attributable CRC risk                                                                                                                   |

|                                                                                                                                                        |                                                                                                                                                                                                                                   |
|--------------------------------------------------------------------------------------------------------------------------------------------------------|-----------------------------------------------------------------------------------------------------------------------------------------------------------------------------------------------------------------------------------|
|                                                                                                                                                        | RR2.3: Design and implement prospective high quality pan-population studies of risk factors for CRC, with robust clinical/pathological data, supporting blood and tissue samples, to inform a population-based assessment of risk |
| RG3: A need for intervention trials of preventive strategies addressing 'dose', timing, target group and acceptability, as well as mechanism of action | RR3.1: Encourage trans-disciplinary, multi-modal approaches to CRC prevention, through cross-community collaboration                                                                                                              |
|                                                                                                                                                        | RR3.2: Ensure future delivery of high-quality robust long-term studies that identify the appropriate level of intervention including dose, duration, timing, feasibility, acceptability as well as clinically-relevant outcome(s) |
| RG4: Lack of interdisciplinary collaboration is undermining evaluation of real life preventative interventions in CRC                                  | RR4.1: Coordinate interventional trial activity to ensure maximum impact of precise and effective prevention strategies across the population                                                                                     |
|                                                                                                                                                        | RR4.2: Promote studies that help elucidate mechanism-of-action of prevention interventions                                                                                                                                        |
|                                                                                                                                                        | RR4.3: Develop precise individual risk-stratification approaches to ensure prevention interventions are employed most effectively.                                                                                                |
| RG5: Lack of an optimal strategy for screening for CRC                                                                                                 | RR5.1: Embed research RCTs in FIT-based screening programmes to explore the optimal FIT threshold and/or the role of Flexible Sigmoidoscopy, incorporating risk adjustment algorithms.                                            |
| RG6: Lack of an effective triage system for symptomatic patients that can determine who will benefit most from invasive investigation                  | RR6.1: Establish accurate risk-based assessment of symptomatic patients, incorporating FIT and promising novel technologies                                                                                                       |
|                                                                                                                                                        | RR6. 2: Develop and trial sensitive and specific tests that could be employed in both screening and symptomatic services.                                                                                                         |
| RG7: Imprecise pathological assessment of CRC is an unmet challenge                                                                                    | RR7.1: Precisely define the morpho-molecular taxonomy of precursor lesions and early-stage disease to help inform risk-stratification in CRC                                                                                      |

|                                                                                                                           |                                                                                                                                                                                                                                                              |
|---------------------------------------------------------------------------------------------------------------------------|--------------------------------------------------------------------------------------------------------------------------------------------------------------------------------------------------------------------------------------------------------------|
|                                                                                                                           | RR7.2: Develop new standardised molecularly-informed multi-parameter algorithms to permit improved prediction of disease recurrence and therapy response                                                                                                     |
|                                                                                                                           | RR7.3: Use our evolving understanding of the CRC tumour and its microenvironment to underpin standardised approaches for pathology specimen analysis                                                                                                         |
| RG8: Lack of qualified personnel to apply state-of-the-art knowledge in genomics, big data science and digital pathology  | RR8.1: Embed interdisciplinary education/training within undergraduate/postgraduate and continuing professional education curriculae to ensure recruitment, retention and upskilling of qualified personnel to deliver modern pathology to the CRC community |
| RG9: Inadequate assessment and communication of risk, benefit and uncertainty of treatment choices where cure is possible | RR9.1: Develop an appropriate evidence base to inform shared decision-making for potentially curative therapies for patients.                                                                                                                                |
| RG10: A need for novel technologies/interventions that have the potential to improve curative outcomes.                   | RR10.1: Establish optimum peri-therapeutic interventions to improve curative outcomes                                                                                                                                                                        |
|                                                                                                                           | RR10.2: Optimise curative approaches for metastatic or recurrent disease, that balance patients expectations with treatment efficacy and health-preserving benefit                                                                                           |
|                                                                                                                           | RR10.3: Develop biomarkers that define the optimal curative therapeutic strategy for an individual or group, preventing over-treatment and improving treatment selection                                                                                     |
|                                                                                                                           | RR10.4: Develop research methodologies to optimally evaluate new curative approaches                                                                                                                                                                         |

|                                                                                                                                                                                                                                                            |                                                                                                                                                                                              |
|------------------------------------------------------------------------------------------------------------------------------------------------------------------------------------------------------------------------------------------------------------|----------------------------------------------------------------------------------------------------------------------------------------------------------------------------------------------|
| <p>RG11: Lack of approaches that take cognisance of the molecular interplay between the metastasising tumour and its microenvironment and help guide evolution of innovative treatments that deliver improved health outcomes for the Stage IV patient</p> | <p>RR11.1: Develop evidence-based approaches utilising multi-modality treatment for patients with stage IV CRC to maximise the utility of cutting-edge technologies to improve outcomes.</p> |
| <p>RG12: Lack of reliable prognostic and predictive biomarkers to help guide stage IV patient pathways</p>                                                                                                                                                 | <p>RR12.1: Establish robust prognostic and predictive biomarkers to stratify patients to ensure every patient receives “bespoke” treatment, relevant to their particular disease course</p>  |
|                                                                                                                                                                                                                                                            | <p>RR12.2: Employ our evolving understanding of the role of the tumour microenvironment in CRC to develop innovative therapies that modulate the microenvironment for clinical benefit</p>   |
| <p>RG13: The need to increase understanding of Health-Related-Quality-of-Life(HRQOL) issues and promote their resolution as part of a research effort to enhance survivorship for those living with and beyond CRC</p>                                     | <p>RR13.1: Precisely characterise the landscape of HRQOL sequelae in patients living with and beyond CRC, including those in receipt of novel treatment approaches (e.g. immunotherapy)</p>  |
|                                                                                                                                                                                                                                                            | <p>RR13.2: Elucidate the causes of symptoms following CRC treatment and develop viable solutions for their prevention and/or management</p>                                                  |
|                                                                                                                                                                                                                                                            | <p>RR13.3: Evaluate the evidence base and impact of lifestyle interventions, including increased physical activity and better nutrition, in CRC</p>                                          |
|                                                                                                                                                                                                                                                            | <p>RR13.4: Develop research to support survivorship care planning and promote shared decision-making for people living with and beyond CRC</p>                                               |

|                                                                                                                                                                                                                                                                                                                          |                                                                                                                                                                                                                                                                         |
|--------------------------------------------------------------------------------------------------------------------------------------------------------------------------------------------------------------------------------------------------------------------------------------------------------------------------|-------------------------------------------------------------------------------------------------------------------------------------------------------------------------------------------------------------------------------------------------------------------------|
| <p>RG14: Lack of coordination of CRC research and its funding, leading to fragmented efforts to elucidate the biology of the disease and translate this knowledge into new preventative agents, screening tools, diagnostics and therapeutics</p>                                                                        | <p>RR14.1: Establish an annual national multi-disciplinary CRC research conference, that draws together the entire CRC community in a co-ordinated research effort</p>                                                                                                  |
|                                                                                                                                                                                                                                                                                                                          | <p>RR14.2 Develop bespoke data-analytics platforms that maximise the value of CRC genomic, clinical, epidemiological and lifestyle data</p>                                                                                                                             |
|                                                                                                                                                                                                                                                                                                                          | <p>RR14.3: Prioritise research resource allocation to recognised research gaps and encourage collaborative research grant calls between complimentary research funding organisations</p>                                                                                |
| <p>RG15: Lack of effective communication strategies between Health Care Professions, CRC patients/survivors, those at elevated risk of developing CRC, and the general public and varying levels of awareness of key risk factors, prevention options and benefits/risks associated with different treatment options</p> | <p>RR15.1: Development of patient- and person-adapted educational materials and shared decision-making tools, in order to empower individual choice</p>                                                                                                                 |
|                                                                                                                                                                                                                                                                                                                          | <p>RR15.2: Embedding strategies that ensure appropriate communication of risk and benefit and best capture Patient Reported Outcome Measures(PROMS) in order to ensure optimal outcomes for patients, their families and carers and those at-risk of developing CRC</p> |

**Supplemental Table 1 Critical Research Gaps and Research Recommendations**
